# Supplementary material for: Exploring the oxygen electrode bi-functional activity of Ni–N–C-doped graphene systems with N, C co-ordination and OH ligand effects
Source: Royal Society of Chemistry journal article supplement (doi:10.1039/d0ta06335e), 2020-01-01
Supplement: d0ta06335e1.pdf [file d0ta06335e1.pdf]

# Electronic Supplementary Information

## Exploring the oxygen electrode bi-functional activity of Ni-N-C doped graphene system with N, C co-ordinations and OH ligand effects

Zhao Liang,<sup>a,†</sup> Mingming Luo,<sup>a,†</sup> Mingwei Chen,<sup>a,†</sup> Xiaopeng Qi,<sup>a</sup> Juan Liu,<sup>b</sup> Chao Liu,<sup>a,c,\*</sup> Shaik Gouse Peera,<sup>d,\*</sup> Tongxiang Liang<sup>a,\*</sup>

<sup>a</sup> Engineering Research Center for Hydrogen Energy Materials and Devices, Faculty of Materials Metallurgy and Chemistry, Jiangxi University of Science and Technology, Ganzhou 341000, China

<sup>b</sup> Department of Mining and Materials Engineering, McGill University, Montreal, QC H3A 0C5, Canada

<sup>c</sup> State Key Laboratory of Metastable Materials Science and Technology, Yanshan University, Qinhuangdao 066004, China

<sup>d</sup> Department of Environmental Science and Engineering, Keimyung University, Daegu 42601, Republic of South Korea

# Contribution equal

\* Corresponding Authors

E-mail address: [liuchao198967@126.com](mailto:liuchao198967@126.com) (Chao Liu), [gousechem@gmail.com](mailto:gousechem@gmail.com) (Shaik Gouse Peera) and [liang\\_tx@126.com](mailto:liang_tx@126.com) (Tongxiang Liang).

**Table S1** Formation energy ( $E_f$ ) and Binding energies ( $E_b$ ) in eV for various types of Ni-N-C-gra configurations.

|       | NiN <sub>4</sub> | NiN <sub>3</sub> C | NiN <sub>2</sub> C <sub>2</sub> -p | NiN <sub>2</sub> C <sub>2</sub> -h | NiN <sub>2</sub> C <sub>2</sub> -o | NiNC <sub>3</sub> |
|-------|------------------|--------------------|------------------------------------|------------------------------------|------------------------------------|-------------------|
| $E_f$ | -4.20            | -3.29              | -2.05                              | -2.41                              | -1.86                              | -0.58             |
| $E_b$ | 7.21             | 8.04               | 9.50                               | 8.32                               | 8.94                               | 8.46              |
|       | NiC <sub>4</sub> | NiN <sub>3</sub>   | NiN <sub>2</sub> C                 | NiNC <sub>2</sub>                  | NiC <sub>3</sub>                   |                   |
| $E_f$ | 1.07             | -1.42              | -0.66                              | -0.06                              | 0.60                               |                   |
| $E_b$ | 6.84             | 4.73               | 5.49                               | 5.61                               | 7.11                               |                   |

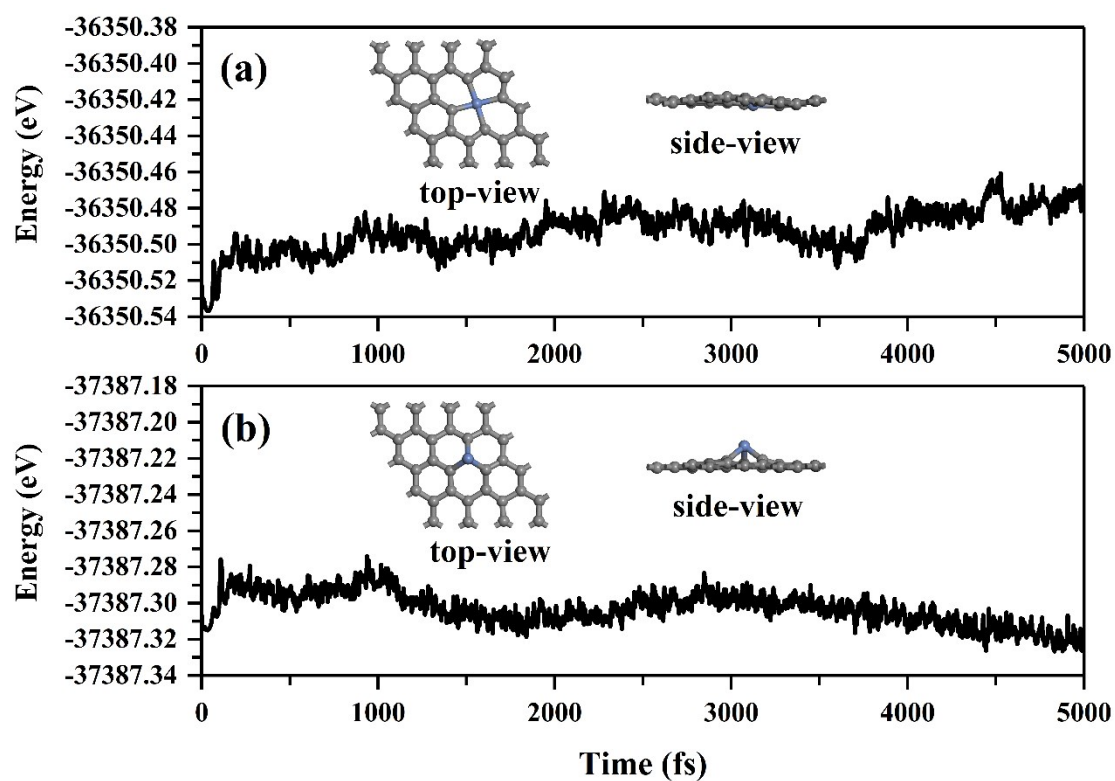

**Fig. S1** Total energy change of (a) NiC<sub>4</sub> and (b) NiC<sub>3</sub> at 5 ps during MD simulations at 500 K, as well as top and side snapshots of the structures at the end of 5 ps.

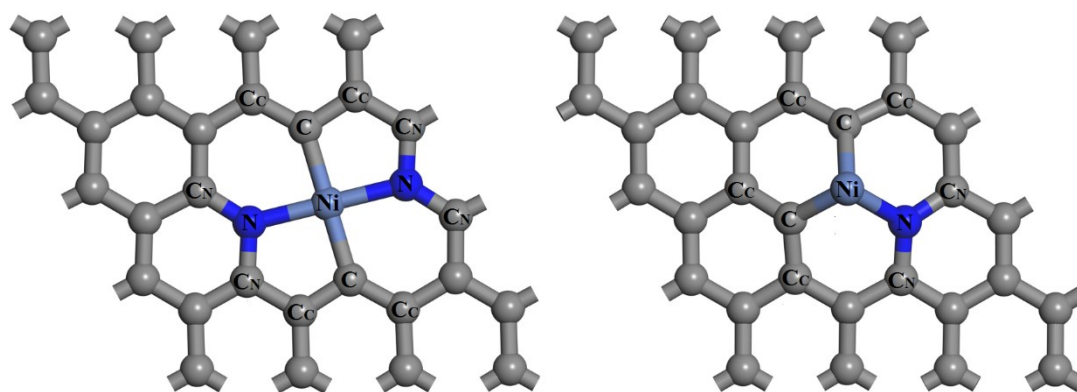

**Fig. S2** Classify atoms according to element type and relative position.

**Table S2**  $Q(\text{Ni})$ ,  $Q(\text{N})$  and  $Q(\text{C})$  refer to the charge on Ni atom, N and C atoms adjacent to Ni atom, respectively.  $Q(\text{C}_\text{N})$  and  $Q(\text{C}_\text{C})$  represent the charge of the outer C atoms of N, C atoms connected to Ni atom, as shown in Fig. S2. The positive and negative numbers represent electrons lost and gained, respectively, based on the analysis of Mulliken charge ( $Q$  in  $e$ ).

|                                   | $Q(\text{Ni})$ | $Q(\text{N})$ | $Q(\text{C})$ | $Q(\text{C}_\text{N})$ | $Q(\text{C}_\text{C})$ |
|-----------------------------------|----------------|---------------|---------------|------------------------|------------------------|
| $\text{NiN}_4$                    | 0.135          | -1.672        |               | 1.644                  |                        |
| $\text{NiN}_3\text{C}$            | 0.004          | -1.269        | -0.012        | 1.279                  | -0.012                 |
| $\text{NiN}_2\text{C}_2\text{-p}$ | -0.110         | -0.814        | -0.108        | 0.810                  | 0.138                  |
| $\text{NiN}_2\text{C}_2\text{-h}$ | -0.116         | -0.868        | -0.012        | 0.946                  | -0.057                 |
| $\text{NiN}_2\text{C}_2\text{-o}$ | -0.067         | -0.824        | -0.134        | 0.908                  | 0                      |
| $\text{NiNC}_3$                   | -0.116         | -0.417        | -0.204        | 0.458                  | 0.110                  |
| $\text{NiC}_4$                    | -0.187         |               | -0.330        |                        | 0.252                  |
| $\text{NiN}_3$                    | 0.446          | -1.328        |               | 1.188                  |                        |
| $\text{NiN}_2\text{C}$            | 0.278          | -0.918        | -0.070        | 0.814                  | 0.023                  |
| $\text{NiNC}_2$                   | 0.149          | -0.484        | -0.130        | 0.411                  | 0.094                  |
| $\text{NiC}_3$                    | 0.039          |               | -0.266        |                        | 0.164                  |

**Table S3** The adsorption configurations of  $*O_2$ ,  $*OOH$ ,  $*O$  and  $*OH$  on various types of Ni-N-C-gra (including hydroxylated Ni-N-C-gra).

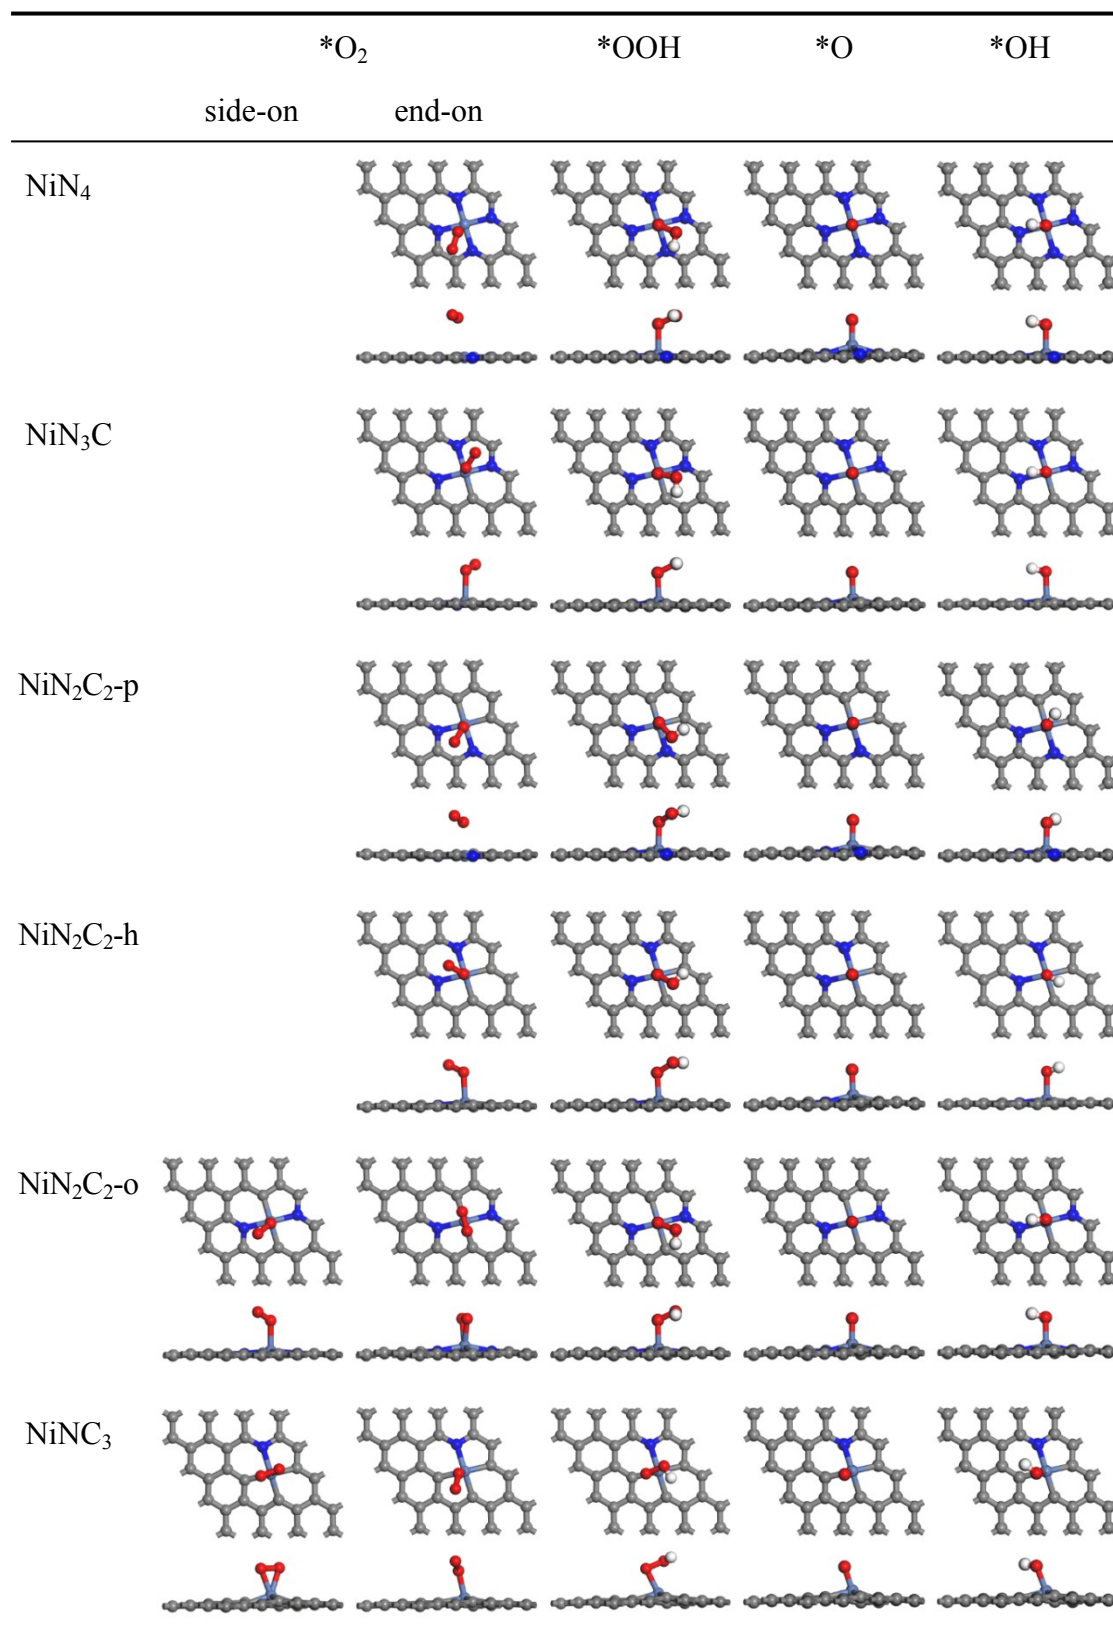

---

NiC<sub>4</sub>

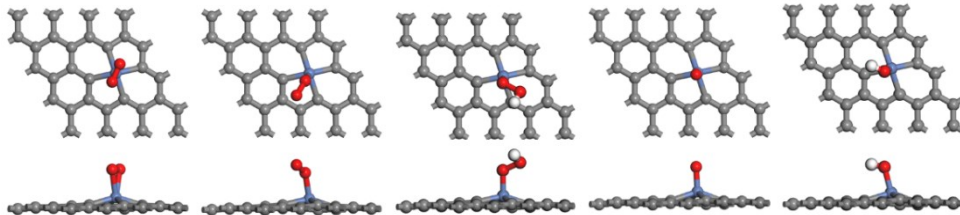

NiN<sub>3</sub>

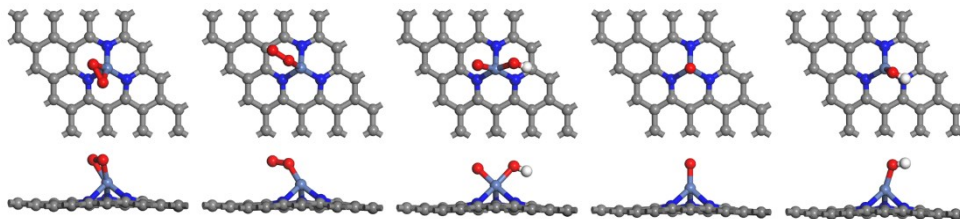

NiN<sub>2</sub>C

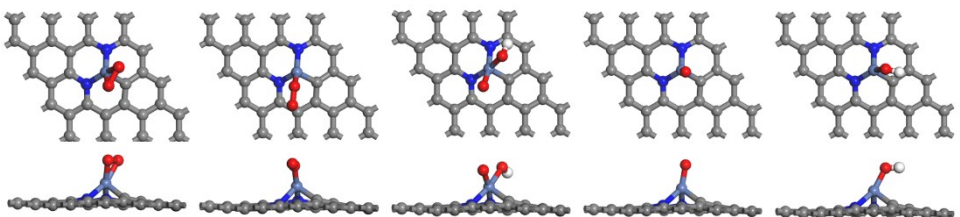

NiNC<sub>2</sub>

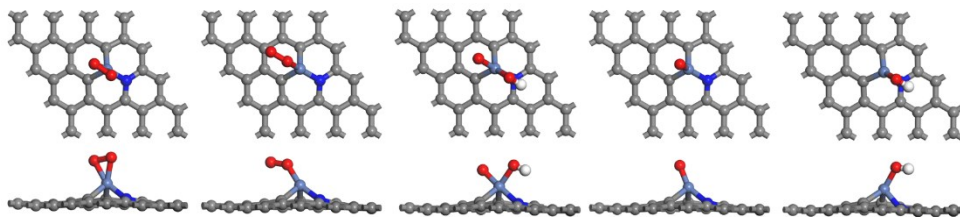

NiC<sub>3</sub>

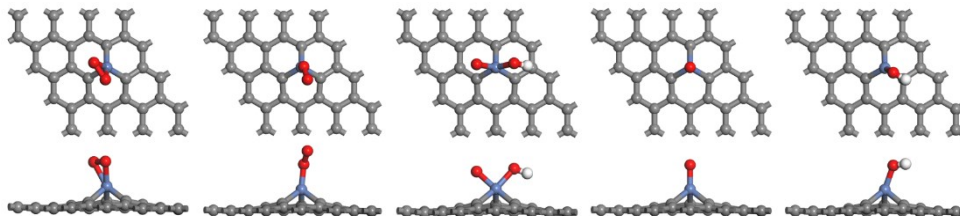

Ni(OH)N<sub>3</sub>

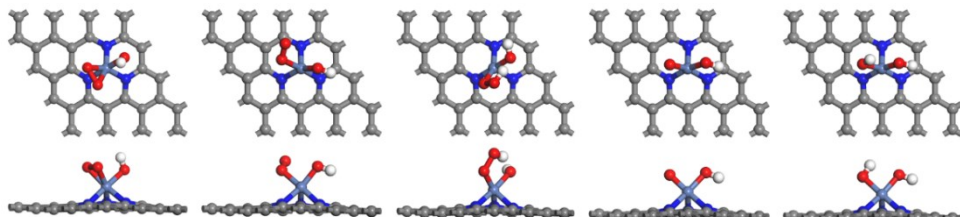

Ni(OH)N<sub>2</sub>C

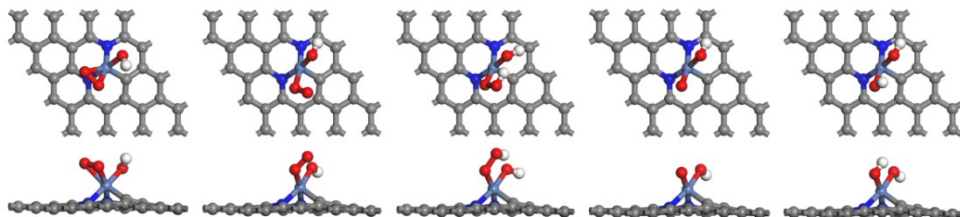

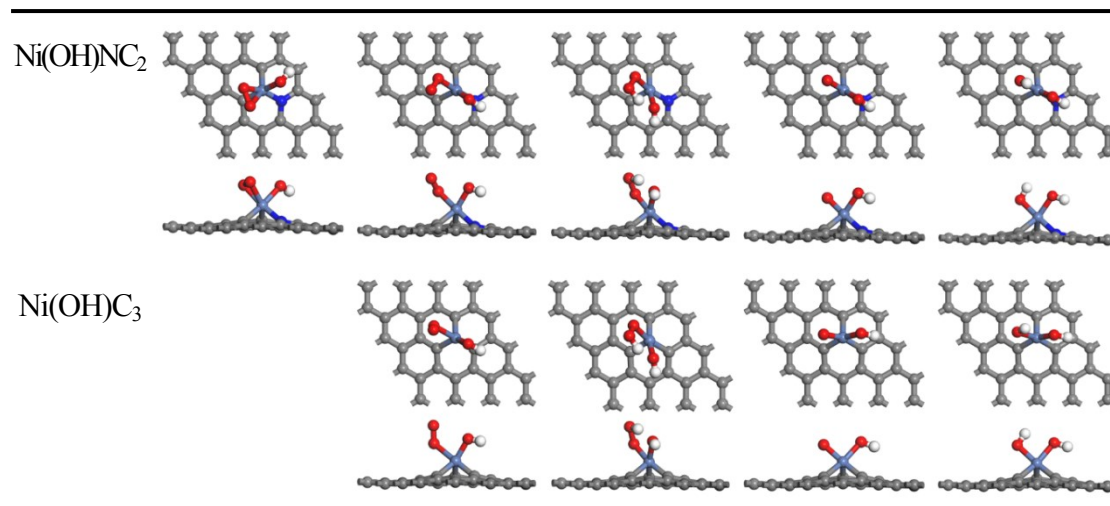

<sup>a</sup>(blank) No stable adsorption configuration was obtained in geometric optimization.

**Table S4** Adsorption energy data ( $\Delta E_{\text{ads}}$ , eV) of reactive species on Ni-N-C-gra (including hydroxylated Ni-N-C-gra).

|                                       | $\Delta E_{*O_2(\text{side-on})}$ | $\Delta E_{*O_2(\text{end-on})}$ | $\Delta E_{*OOH}$ | $\Delta E_{*O}$ | $\Delta E_{*OH}$ |
|---------------------------------------|-----------------------------------|----------------------------------|-------------------|-----------------|------------------|
| <b>NiN<sub>4</sub></b>                |                                   | -0.29                            | -0.60             | -2.05           | -1.61            |
| <b>NiN<sub>3</sub>C</b>               |                                   | -0.36                            | -0.83             | -2.25           | -1.90            |
| <b>NiN<sub>2</sub>C<sub>2</sub>-p</b> |                                   | -0.30                            | -0.86             | -2.43           | -1.94            |
| <b>NiN<sub>2</sub>C<sub>2</sub>-h</b> |                                   | -0.36                            | -0.85             | -2.49           | -1.94            |
| <b>NiN<sub>2</sub>C<sub>2</sub>-o</b> | -0.12                             | -0.38                            | -0.84             | -2.54           | -1.91            |
| <b>NiNC<sub>3</sub></b>               | -0.51                             | -0.42                            | -1.06             | -2.84           | -2.17            |
| <b>NiC<sub>4</sub></b>                | -0.72                             | -0.64                            | -1.38             | -3.30           | -2.52            |
| <b>NiN<sub>3</sub></b>                | -2.51                             | -1.90                            | -3.34             | -5.00           | -4.00            |
| <b>NiN<sub>2</sub>C</b>               | -2.24                             | -1.87                            | -3.22             | -4.94           | -3.83            |
| <b>NiNC<sub>2</sub></b>               | -2.08                             | -1.60                            | -2.88             | -4.92           | -3.72            |
| <b>NiC<sub>3</sub></b>                | -1.84                             | -1.29                            | -2.55             | -5.08           | -3.76            |
| <b>Ni(OH)N<sub>3</sub></b>            | -0.87                             | -0.86                            | -1.87             | -3.19           | -2.85            |
| <b>Ni(OH)N<sub>2</sub>C</b>           | -0.91                             | -0.86                            | -1.87             | -3.25           | -2.92            |

|                     |       |       |       |       |       |
|---------------------|-------|-------|-------|-------|-------|
| $\text{Ni(OH)NC}_2$ | -0.52 | -0.71 | -1.72 | -3.02 | -2.74 |
| $\text{Ni(OH)C}_3$  |       | -0.46 | -1.53 | -2.65 | -2.48 |

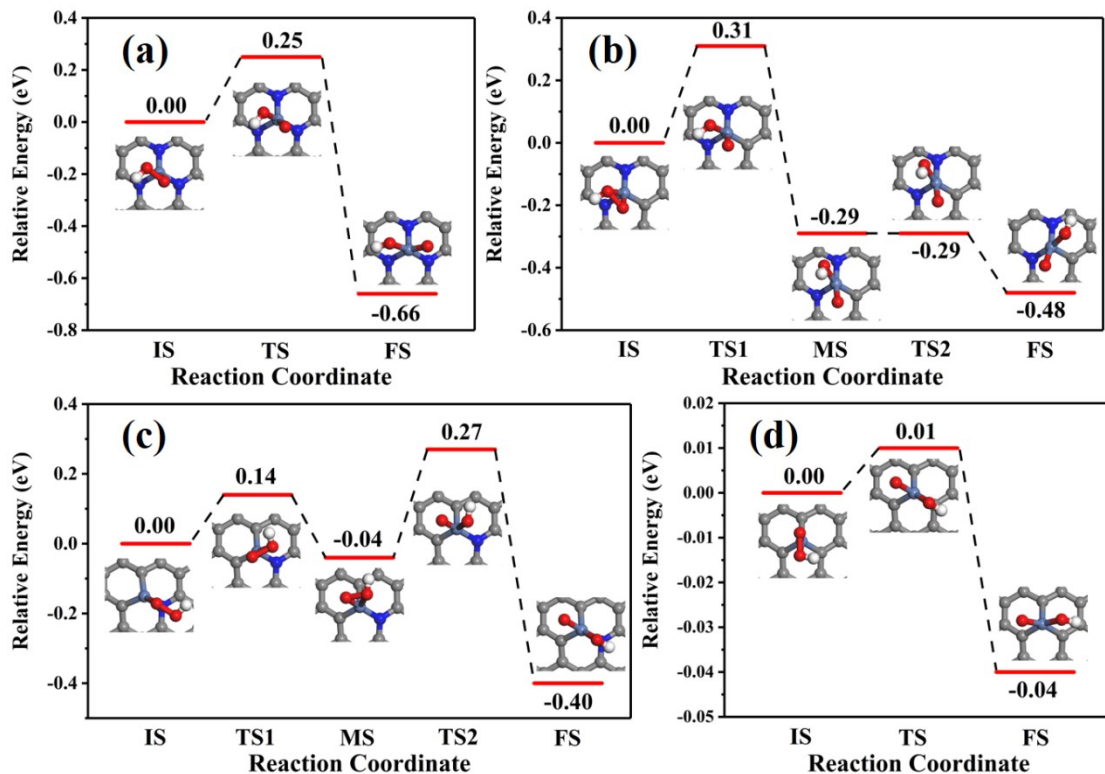

**Fig. S3** Optimized structures of the initial state (IS), transition state (TS), mediate state (MS), and final state (FS) of OOH dissociation on three-coordination catalysts and corresponding energy barriers for the reaction:

**Table S5** Free energy changes of  $\Delta G_x$  ( $x=1-4$ , eV) and overpotential ( $\eta$ , V) of ORR/OER on four-coordination Ni-N-C-gra.

|                        |     | $\Delta G1$ | $\Delta G2$ | $\Delta G3$ | $\Delta G4$ | $\eta$ |
|------------------------|-----|-------------|-------------|-------------|-------------|--------|
| $\text{NiN}_4$         | ORR | 0.77        | -0.28       | -1.09       | -1.00       | 1.17   |
|                        | OER | 1.00        | 1.09        | 0.28        | -0.77       | 0.69   |
| $\text{NiN}_3\text{C}$ | ORR | 0.59        | -0.25       | -1.20       | -0.75       | 1.00   |
|                        | OER | 0.75        | 1.20        | 0.25        | -0.59       | 0.80   |

|                                       |            |      |       |       |       |      |
|---------------------------------------|------------|------|-------|-------|-------|------|
| <b>NiN<sub>2</sub>C<sub>2</sub>-p</b> | <b>ORR</b> | 0.58 | -0.41 | -1.05 | -0.73 | 0.98 |
|                                       | <b>OER</b> | 0.73 | 1.05  | 0.41  | -0.58 | 0.65 |
| <b>NiN<sub>2</sub>C<sub>2</sub>-h</b> | <b>ORR</b> | 0.57 | -0.44 | -1.04 | -0.69 | 0.97 |
|                                       | <b>OER</b> | 0.69 | 1.04  | 0.44  | -0.57 | 0.64 |
| <b>NiN<sub>2</sub>C<sub>2</sub>-o</b> | <b>ORR</b> | 0.59 | -0.52 | -0.95 | -0.73 | 0.99 |
|                                       | <b>OER</b> | 0.73 | 0.95  | 0.52  | -0.59 | 0.55 |
| <b>NiNC<sub>3</sub></b>               | <b>ORR</b> | 0.43 | -0.68 | -0.83 | -0.52 | 0.83 |
|                                       | <b>OER</b> | 0.52 | 0.83  | 0.68  | -0.43 | 0.43 |
| <b>NiC<sub>4</sub></b>                | <b>ORR</b> | 0.08 | -0.80 | -0.70 | -0.18 | 0.48 |
|                                       | <b>OER</b> | 0.18 | 0.70  | 0.80  | -0.08 | 0.40 |



**Table S6** Free energy changes ( $\Delta G$ , eV) and overpotential ( $\eta$ , V) of ORR on three-coordination Ni-N-C-gra.

| <b>Pathway 1</b>   | $\Delta G_{\text{O}_2 \rightarrow (*\text{O} + * \text{OH})}$ | $\Delta G_{(*\text{O} + * \text{OH}) \rightarrow * \text{O}}$   | $\Delta G_{*\text{O} \rightarrow * \text{OH}}$     | $\Delta G_{*\text{OH} \rightarrow \text{OH}^-}$ | $\eta$ |
|--------------------|---------------------------------------------------------------|-----------------------------------------------------------------|----------------------------------------------------|-------------------------------------------------|--------|
| NiN <sub>3</sub>   | -1.86                                                         | -0.44                                                           | -0.63                                              | 1.33                                            | 1.73   |
| NiN <sub>2</sub> C | -1.73                                                         | -0.60                                                           | -0.45                                              | 1.17                                            | 1.57   |
| NiNC <sub>2</sub>  | -1.43                                                         | -0.82                                                           | -0.36                                              | 1.00                                            | 1.40   |
| NiC <sub>3</sub>   | -1.04                                                         | -1.30                                                           | -0.32                                              | 1.06                                            | 1.46   |
| <b>Pathway 2</b>   | $\Delta G_{\text{O}_2 \rightarrow (*\text{O} + * \text{OH})}$ | $\Delta G_{(*\text{O} + * \text{OH}) \rightarrow 2 * \text{O}}$ | $\Delta G_{2 * \text{OH} \rightarrow * \text{OH}}$ | $\Delta G_{*\text{OH} \rightarrow \text{OH}^-}$ | $\eta$ |
| NiN <sub>3</sub>   | -1.86                                                         | -1.12                                                           | 0.05                                               | 1.33                                            | 1.73   |
| NiN <sub>2</sub> C | -1.73                                                         | -1.17                                                           | 0.12                                               | 1.17                                            | 1.57   |
| NiNC <sub>2</sub>  | -1.43                                                         | -1.20                                                           | 0.03                                               | 1.00                                            | 1.40   |
| NiC <sub>3</sub>   | -1.04                                                         | -1.31                                                           | -0.31                                              | 1.06                                            | 1.46   |

**Table S7** Free energy changes ( $\Delta G$ , eV) and overpotential ( $\eta$ , V) of OER on three-coordination Ni-N-C-gra.

| <b>Pathway 1</b>   | $\Delta G_{\text{OH}^- \rightarrow * \text{OH}}$ | $\Delta G_{* \text{OH} \rightarrow * \text{O}}$    | $\Delta G_{* \text{O} \rightarrow (* \text{O} + * \text{OH})}$   | $\Delta G_{(* \text{O} + * \text{OH}) \rightarrow (* \text{OOH} + * \text{OH})}$ | $\Delta G_{(* \text{OOH} + * \text{OH}) \rightarrow *}$ | <b><math>\eta</math></b> |
|--------------------|--------------------------------------------------|----------------------------------------------------|------------------------------------------------------------------|----------------------------------------------------------------------------------|---------------------------------------------------------|--------------------------|
| NiN <sub>3</sub>   | -1.33                                            | 0.63                                               | 0.44                                                             | 0.24                                                                             | 0.30                                                    | 0.23                     |
| NiN <sub>2</sub> C | -1.17                                            | 0.45                                               | 0.60                                                             | 0.26                                                                             | 0.30                                                    | 0.20                     |
| NiNC <sub>2</sub>  | -1.00                                            | 0.36                                               | 0.82                                                             | 0.20                                                                             | 0.23                                                    | 0.42                     |
| NiC <sub>3</sub>   | -1.06                                            | 0.32                                               | 1.30                                                             | -0.02                                                                            | 0.01                                                    | 0.90                     |
| <b>Pathway 2</b>   | $\Delta G_{\text{OH}^- \rightarrow * \text{OH}}$ | $\Delta G_{* \text{OH} \rightarrow 2 * \text{OH}}$ | $\Delta G_{2 * \text{OH} \rightarrow (* \text{O} + * \text{O})}$ | $\Delta G_{(* \text{O} + * \text{OH}) \rightarrow (* \text{OOH} + * \text{OH})}$ | $\Delta G_{(* \text{OOH} + * \text{OH}) \rightarrow *}$ | <b><math>\eta</math></b> |
| NiN <sub>3</sub>   | -1.33                                            | -0.05                                              | 1.12                                                             | 0.24                                                                             | 0.30                                                    | 0.72                     |
| NiN <sub>2</sub> C | -1.17                                            | -0.12                                              | 1.17                                                             | 0.26                                                                             | 0.30                                                    | 0.77                     |
| NiNC <sub>2</sub>  | -1.00                                            | -0.03                                              | 1.20                                                             | 0.20                                                                             | 0.23                                                    | 0.80                     |
| NiC <sub>3</sub>   | -1.06                                            | 0.31                                               | 1.31                                                             | -0.02                                                                            | 0.01                                                    | 0.91                     |

**Fig. S4** Various adsorption configurations of H<sub>2</sub>O<sub>2</sub> on three-coordination catalysts.

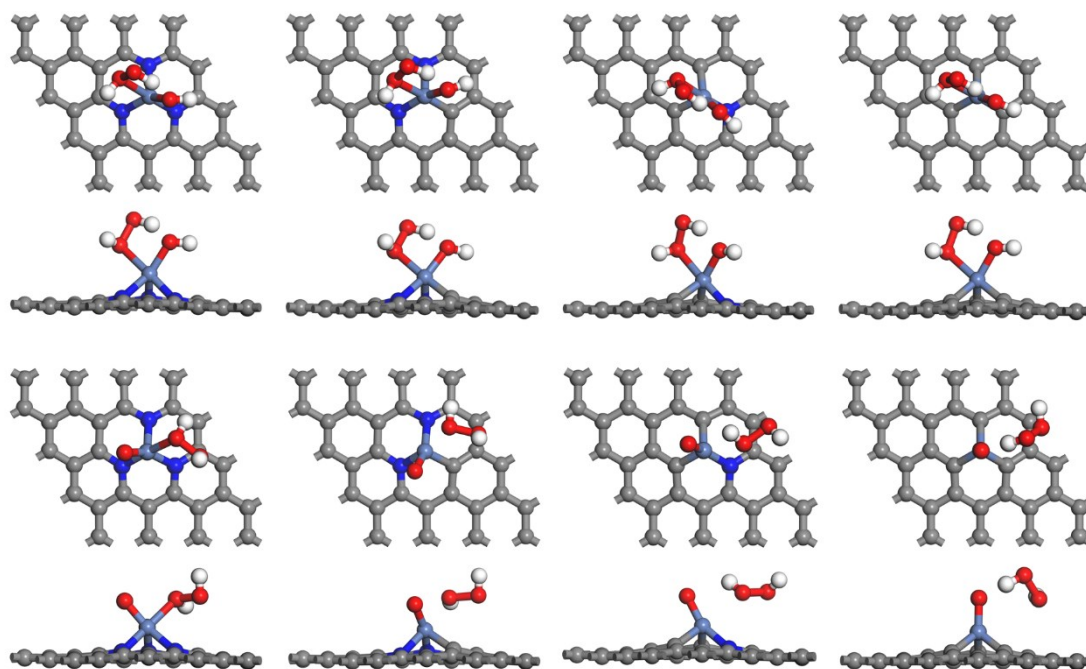

**Table S8** Free energy change ( $\Delta G$ , eV) of H<sub>2</sub>O<sub>2</sub> formation.

|                    | $\Delta G_{(*O + *OH) \rightarrow (*O + H_2O_2)}$ | $\Delta G_{2 *OH \rightarrow (*OH + *H_2O_2)}$ |
|--------------------|---------------------------------------------------|------------------------------------------------|
| NiN <sub>3</sub>   | 1.68                                              | 1.99                                           |
| NiN <sub>2</sub> C | 1.52                                              | 1.86                                           |
| NiNC <sub>2</sub>  | 1.30                                              | 1.99                                           |
| NiC <sub>3</sub>   | 0.82                                              | 1.58                                           |

**Table S9** Free energy changes of  $\Delta G_x$  (x=1-4) and overpotential ( $\eta$ ) of ORR on hydroxylated Ni-N-C-gra.

|                        |     | $\Delta G1$ | $\Delta G2$ | $\Delta G3$ | $\Delta G4$ | $\eta$ |
|------------------------|-----|-------------|-------------|-------------|-------------|--------|
| Ni(OH)N <sub>3</sub>   | ORR | -0.30       | -0.24       | -1.12       | 0.05        | 0.45   |
| Ni(OH)N <sub>2</sub> C | ORR | -0.30       | -0.26       | -1.17       | 0.12        | 0.52   |

|                             |            |       |       |       |       |      |
|-----------------------------|------------|-------|-------|-------|-------|------|
| <b>Ni(OH)NC<sub>2</sub></b> | <b>ORR</b> | -0.23 | -0.20 | -1.20 | 0.03  | 0.43 |
| <b>Ni(OH)C<sub>3</sub></b>  | <b>ORR</b> | 0     | 0.02  | -1.31 | -0.31 | 0.42 |

**Table S10** Adsorption free energies ( $\Delta G_{\text{ads}}$ , eV) of the intermediate species (\*OOH, \*O and \*OH) adsorbed on various Ni-N-C-gra configurations (including Ni-N-C-gra).

|                                       | $\Delta G_{* \text{OOH}}$ | $\Delta G_{* \text{O}}$ | $\Delta G_{* \text{OH}}$ |                             | $\Delta G_{* \text{OOH}}$ | $\Delta G_{* \text{O}}$ | $\Delta G_{* \text{OH}}$ |
|---------------------------------------|---------------------------|-------------------------|--------------------------|-----------------------------|---------------------------|-------------------------|--------------------------|
| <b>NiN<sub>4</sub></b>                | 4.86                      | 3.75                    | 1.83                     | <b>NiN<sub>3</sub></b>      | 2.23                      | 0.97                    | -0.50                    |
| <b>NiN<sub>3</sub>C</b>               | 4.68                      | 3.61                    | 1.58                     | <b>NiN<sub>2</sub>C</b>     | 2.36                      | 0.93                    | -0.34                    |
| <b>NiN<sub>2</sub>C<sub>2</sub>-p</b> | 4.67                      | 3.43                    | 1.56                     | <b>NiNC<sub>2</sub></b>     | 2.66                      | 1.01                    | -0.17                    |
| <b>NiN<sub>2</sub>C<sub>2</sub>-h</b> | 4.66                      | 3.39                    | 1.52                     | <b>NiC<sub>3</sub></b>      | 3.05                      | 0.92                    | -0.23                    |
| <b>NiN<sub>2</sub>C<sub>2</sub>-o</b> | 4.68                      | 3.34                    | 1.56                     | <b>Ni(OH)N<sub>3</sub></b>  | 3.79                      | 2.73                    | 0.78                     |
| <b>NiNC<sub>3</sub></b>               | 4.52                      | 3.01                    | 1.35                     | <b>Ni(OH)N<sub>2</sub>C</b> | 3.79                      | 2.70                    | 0.71                     |
| <b>NiC<sub>4</sub></b>                | 4.17                      | 2.54                    | 1.01                     | <b>Ni(OH)NC<sub>2</sub></b> | 3.86                      | 2.83                    | 0.80                     |
|                                       |                           |                         |                          | <b>Ni(OH)C<sub>3</sub></b>  | 4.09                      | 3.28                    | 1.14                     |

**Table S11** Mulliken charge population on Ni, N, C, C<sub>N</sub> and C<sub>C</sub> atoms of each Ni-N-C-gra with an adsorbed O<sub>2</sub>. The positive and negative values in the brackets represent the loss and accumulation of electrons after \*O<sub>2</sub> adsorption, respectively. (Q in e)

|                                       | Q(*O <sub>2</sub> ) | Q(Ni)    | Q(N)     | Q(C)    | Q(C <sub>N</sub> ) | Q(C <sub>C</sub> ) |
|---------------------------------------|---------------------|----------|----------|---------|--------------------|--------------------|
| <b>NiN<sub>4</sub></b>                | -0.196              | 0.156    | -1.640   |         | 1.694              |                    |
|                                       |                     | (0.021)  | (0.032)  |         | (0.050)            |                    |
| <b>NiN<sub>3</sub>C</b>               | -0.266              | 0.083    | -1.236   | -0.002  | 1.309              | 0.006              |
|                                       |                     | (0.079)  | (0.033)  | (0.010) | (0.030)            | (0.018)            |
| <b>NiN<sub>2</sub>C<sub>2</sub>-p</b> | -0.189              | -0.046   | -0.800   | -0.095  | 0.822              | 0.129              |
|                                       |                     | (0.064)  | (0.014)  | (0.013) | (0.012)            | (-0.009)           |
| <b>NiN<sub>2</sub>C<sub>2</sub>-h</b> | -0.229              | -0.019   | -0.851   | -0.011  | 0.957              | -0.020             |
|                                       |                     | (0.097)  | (0.017)  | (0.001) | (0.011)            | (0.037)            |
| <b>NiN<sub>2</sub>C<sub>2</sub>-o</b> | -0.235              | 0.030    | -0.828   | -0.111  | 0.924              | 0.036              |
|                                       |                     | (0.097)  | (-0.004) | (0.023) | (0.016)            | (0.036)            |
| <b>NiNC<sub>3</sub></b>               | -0.324              | 0.005    | -0.410   | -0.144  | 0.461              | 0.148              |
|                                       |                     | (0.121)  | (0.007)  | (0.060) | (0.003)            | (0.038)            |
| <b>NiC<sub>4</sub></b>                | -0.266              | -0.059   |          | -0.266  |                    | 0.273              |
|                                       |                     | (0.128)  |          | (0.064) |                    | (0.021)            |
| <b>NiN<sub>3</sub></b>                | -0.611              | 0.421    | -1.240   |         | 1.362              |                    |
|                                       |                     | (-0.025) | (0.088)  |         | (0.174)            |                    |
| <b>NiN<sub>2</sub>C</b>               | -0.612              | 0.298    | -0.876   | 0.038   | 0.923              | 0.099              |
|                                       |                     | (0.020)  | (0.042)  | (0.108) | (0.109)            | (0.076)            |
| <b>NiNC<sub>2</sub></b>               | -0.605              | 0.181    | -0.439   | -0.046  | 0.455              | 0.166              |
|                                       |                     | (0.032)  | (0.045)  | (0.084) | (0.044)            | (0.072)            |
| <b>NiC<sub>3</sub></b>                | -0.577              | 0.058    |          | -0.104  |                    | 0.205              |
|                                       |                     | (0.019)  |          | (0.162) |                    | (0.041)            |

**Table S12** Mulliken charge population on Ni, N, C, C<sub>N</sub>, C<sub>C</sub> and \*OH of each hydroxylated Ni-N-C-gra. The positive and negative values in the brackets represent the loss and accumulation of electrons, respectively. (Q in e)

|                        | Q(Ni) | Q(N)   | Q(C)   | Q(C <sub>N</sub> ) | Q(C <sub>C</sub> ) | Q(*OH) |
|------------------------|-------|--------|--------|--------------------|--------------------|--------|
| Ni(OH)N <sub>3</sub>   | 0.463 | -1.293 | 0      | 1.283              |                    | -0.413 |
| Ni(OH)N <sub>2</sub> C | 0.312 | -0.921 | 0.034  | 0.854              | 0.057              | -0.331 |
| Ni(OH)NC <sub>2</sub>  | 0.141 | -0.433 | -0.078 | 0.365              | 0.120              | -0.363 |
| Ni(OH)C <sub>3</sub>   | 0.069 | 0      | -0.170 |                    | 0.186              | -0.343 |

**Table S13** Mulliken charge population on Ni, N, C, C<sub>N</sub>, C<sub>C</sub> and \*OH of each hydroxylated Ni-N-C-gra with an adsorbed O<sub>2</sub>. The positive and negative values in the brackets represent the loss and accumulation of electrons after \*O<sub>2</sub> adsorption, respectively. (Q in e)

|                        | Q(*O <sub>2</sub> ) | Q(Ni)    | Q(N)    | Q(C)     | Q(C <sub>N</sub> ) | Q(C <sub>C</sub> ) | Q(*OH)  |
|------------------------|---------------------|----------|---------|----------|--------------------|--------------------|---------|
| Ni(OH)N <sub>3</sub>   | -0.517              | 0.366    | -1.160  | 0        | 1.458              |                    | -0.288  |
|                        |                     | (-0.097) | (0.133) |          | (0.175)            |                    | (0.125) |
| Ni(OH)N <sub>2</sub> C | -0.392              | 0.230    | -0.823  | 0.027    | 0.929              | 0.099              | -0.271  |
|                        |                     | (-0.082) | (0.098) | (-0.007) | (0.075)            | (0.042)            | (0.060) |
| Ni(OH)NC <sub>2</sub>  | -0.274              | 0.152    | -0.432  | -0.059   | 0.418              | 0.171              | -0.323  |
|                        |                     | (0.011)  | (0.001) | (0.019)  | (0.053)            | (0.051)            | (0.040) |
| Ni(OH)C <sub>3</sub>   | -0.256              | 0.028    | 0       | -0.123   |                    | 0.212              | -0.308  |
|                        |                     | (-0.041) |         | (0.047)  |                    | (0.026)            | (0.035) |

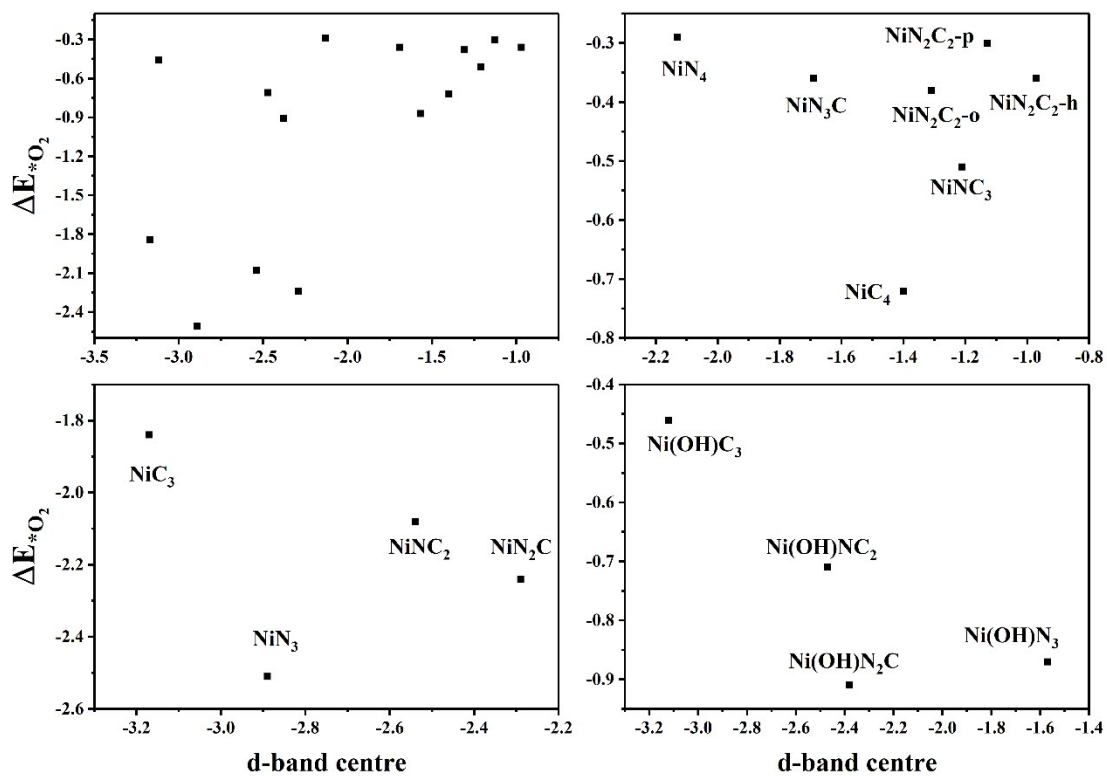

**Fig. S5** The relationship between oxygen adsorption energy and d-band center. (Integral

$$\varepsilon_d = \frac{\int_{-\infty}^{+\infty} \rho(\varepsilon)\varepsilon d\varepsilon}{\int_{-\infty}^{+\infty} \rho(\varepsilon) d\varepsilon}$$

range  $-\infty$  to  $+\infty$ , , where  $\rho$  are the densities of states and  $\varepsilon$  are the energies.)

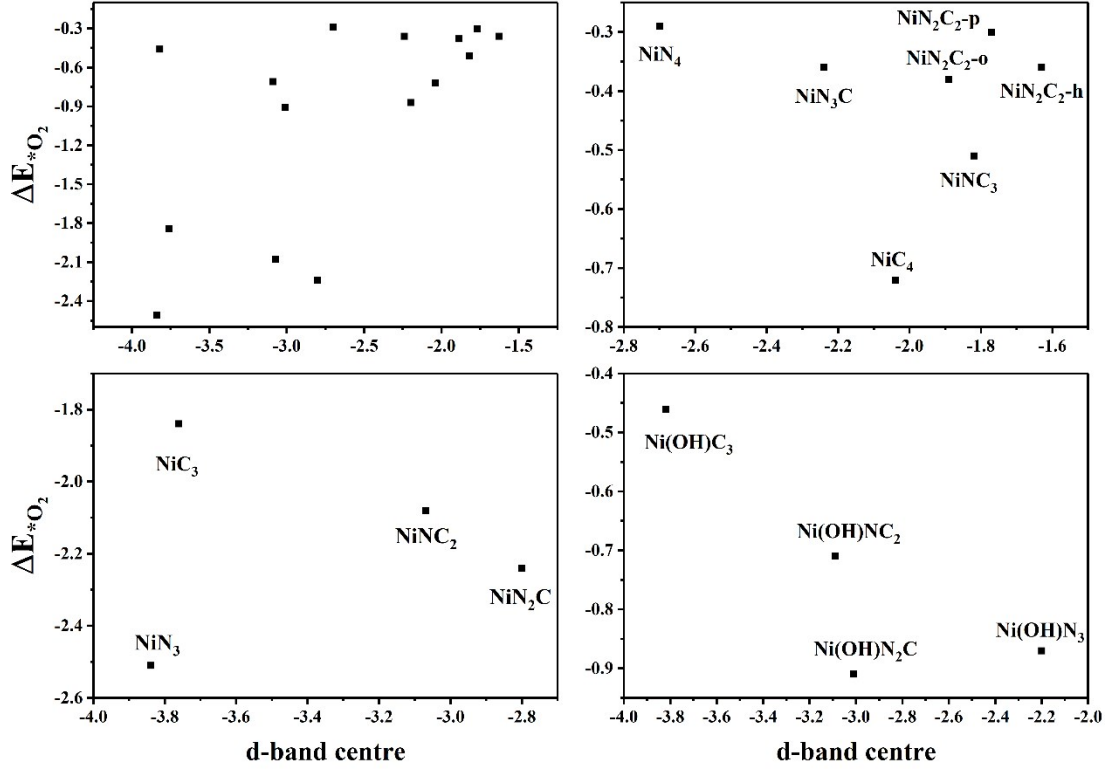

**Fig. S6** The relationship between oxygen adsorption energy and d-band center. (Integral

$$\varepsilon_d = \frac{\int_{-\infty}^{E_F} \rho(\varepsilon) \varepsilon d\varepsilon}{\int_{-\infty}^{E_F} \rho(\varepsilon) d\varepsilon}$$

range  $-\infty$  to  $E_F$  (Fermi level), where  $\rho$  are the densities of states and  $\varepsilon$  are the energies.)

**Table S14** Values of PDOS abundance near Fermi level ( $D_F$ ) in different intervals.

| $D_F = \int_{-x}^x \rho(\varepsilon) d\varepsilon$ | (-0.2, 0.2) | (-0.5, 0.5) | (-0.7, 0.7) | (-1, 1) |
|----------------------------------------------------|-------------|-------------|-------------|---------|
| NiN <sub>4</sub>                                   | 0.02        | 0.09        | 0.22        | 1.09    |
| NiN <sub>3</sub> C                                 | 0.10        | 0.34        | 0.94        | 2.40    |
| NiN <sub>2</sub> C <sub>2</sub> -p                 | 0.72        | 2.13        | 3.15        | 4.42    |



|                                    |      |      |      |      |
|------------------------------------|------|------|------|------|
| NiN <sub>2</sub> C <sub>2</sub> -h | 1.23 | 2.97 | 3.88 | 5.39 |
| NiN <sub>2</sub> C <sub>2</sub> -o | 0.35 | 1.37 | 2.44 | 3.85 |
| NiNC <sub>3</sub>                  | 0.43 | 1.41 | 2.56 | 4.25 |
| NiC <sub>4</sub>                   | 0.49 | 0.97 | 1.35 | 2.63 |
| NiN <sub>3</sub>                   | 0.29 | 1.42 | 1.59 | 1.91 |
| NiN <sub>2</sub> C                 | 0.29 | 0.83 | 1.20 | 1.88 |
| NiNC <sub>2</sub>                  | 0.13 | 0.65 | 1.11 | 1.61 |
| NiC <sub>3</sub>                   | 0.09 | 0.54 | 1.00 | 1.33 |
| Ni(OH)N <sub>3</sub>               | 0.59 | 1.38 | 2.06 | 3.26 |
| Ni(OH)N <sub>2</sub> C             | 0.14 | 0.63 | 1.14 | 1.89 |
| Ni(OH)NC <sub>2</sub>              | 0.25 | 0.86 | 1.16 | 1.42 |
| Ni(OH)C <sub>3</sub>               | 0.18 | 0.29 | 0.41 | 0.91 |

---
